1 **RNase HI depletion strongly potentiates cell killing by rifampicin in**  
2 **mycobacteria.**

3

4 Abeer Al-Zubaidi,<sup>a,b</sup> Chen-Yi Cheung,<sup>c</sup> Gregory M. Cook,<sup>b,c</sup> George Taiaroa,<sup>d</sup> Valerie  
5 Mizrahi,<sup>e</sup> J. Shaun Lott,<sup>a,b#</sup> and Stephanie S. Dawes.<sup>a,b#</sup>

6

7 <sup>a</sup> School of Biological Sciences and <sup>b</sup>Maurice Wilkins Centre for Molecular Biodiscovery,  
8 The University of Auckland, Auckland 1142, New Zealand.

9 <sup>c</sup> Department of Microbiology and Immunology, School of Biomedical Sciences, University  
10 of Otago, Dunedin, New Zealand

11 <sup>d</sup> Department of Microbiology and Immunology, The Peter Doherty Institute for Infection  
12 and Immunity at The University of Melbourne, Melbourne, Victoria, Australia

13 <sup>e</sup> MRC/NHLS/UCT Molecular Mycobacteriology Research Unit & DST/NRF Centre of  
14 Excellence for Biomedical TB Research & Wellcome Centre for Infectious Diseases  
15 Research in Africa, Institute of Infectious Disease & Molecular Medicine, & Department of  
16 Pathology, University of Cape Town, Anzio Road, Observatory 7925, Cape Town, South  
17 Africa.

18 **Running Head:** RNase HI depletion potentiates rifampicin killing.

19 # Address correspondence to Stephanie S. Dawes ([s.dawes@auckland.ac.nz](mailto:s.dawes@auckland.ac.nz)) or J. Shaun Lott  
20 ([s.lott@auckland.ac.nz](mailto:s.lott@auckland.ac.nz))

21 **Abstract**

22 Multidrug resistant (MDR) tuberculosis (TB) is defined by the resistance of *Mycobacterium*  
23 *tuberculosis*, the causative organism, to the first-line antibiotics rifampicin and isoniazid.  
24 Mitigating or reversing resistance to these drugs offers a means of preserving and extending  
25 their use in TB treatment. R-loops are RNA/DNA hybrids that are formed in the genome  
26 during transcription, and can be lethal to the cell if not resolved. RNase HI is an enzyme that  
27 removes R-loops, and this activity is essential in *M. tuberculosis*: knockouts of *rnhC*, the  
28 gene encoding RNase HI, are non-viable. This essentiality supports it as a candidate target for  
29 the development of new antibiotics. In the model organism *Mycobacterium smegmatis*,  
30 RNase HI activity is provided by two RNase HI enzymes, RnhA and RnhC. We show that the  
31 partial depletion of RNase HI activity in *M. smegmatis*, by knocking out either of the genes  
32 encoding RnhA or RnhC, led to the accumulation of R-loops. The sensitivity of the knockout  
33 strains to the antibiotics moxifloxacin, streptomycin and rifampicin was increased, with  
34 sensitivity to the transcriptional inhibitor rifampicin strikingly increased by nearly 100-fold.  
35 We also show that R-loop accumulation accompanies partial transcriptional inhibition,  
36 suggesting a mechanistic basis for the synergy between RNase HI depletion and  
37 transcriptional inhibition. A model of how transcriptional inhibition can potentiate R-loop  
38 accumulation is presented. Finally, we identified four small molecules that inhibit  
39 recombinant RnhC activity and that also potentiated rifampicin activity in whole-cell assays  
40 against *M. tuberculosis*, supporting an on-target mode of action, and providing the first step  
41 in developing a new class of anti-mycobacterial drug.

42

43 **Importance**

44 This study validates mycobacterial RNase HI as a druggable, vulnerable candidate for a new  
45 therapeutic treatment of *M. tuberculosis* with a novel mode of action. RNase HI depletion  
46 shows synergistic bacterial killing with some current first- and second-line antibiotics,  
47 suggesting that RNase HI inhibitors would combine well with these regimens, and could  
48 potentially accelerate the clearance of drug-sensitive strains. RNase HI inhibitors also have  
49 the potential to reduce the effective dose of rifampicin, with the concomitant reduction in  
50 side effects. The potentiation of rifampicin efficacy conferred by RNase HI deficiency  
51 suggests that RNase HI inhibitors may be able to mitigate against development of rifampicin  
52 resistance. The synergy may also be able to reverse rifampicin resistance, rescuing this  
53 antibiotic for therapy. The surprising finding that low levels of transcriptional inhibition  
54 potentiate R-loop formation provides a key new insight into R-loop metabolism.

55

56

## 57 **Introduction**

58 The emergence of drug-resistant bacteria has been recognised as a global health crisis (1). If  
59 left unchecked, antibiotic resistance threatens to overturn the substantial gains that have been  
60 made to human healthcare by the use of antibiotics to treat and prevent infectious disease,  
61 resulting in huge social and economic costs. Globally, the antibiotic resistance crisis has been  
62 spearheaded by the alarmingly rapid rise in the prevalence of *M. tuberculosis* strains that are  
63 resistant to the cornerstone antibiotics of first-line TB therapy, rifampicin (which inhibits  
64 transcription) and isoniazid (which inhibits cell wall biosynthesis). The situation has been  
65 exacerbated by the emergence and spread of extensively drug-resistant (XDR)  
66 *M. tuberculosis* strains that are also resistant to second-line TB therapeutics, such as the  
67 fluoroquinolones (which inhibit DNA topoisomerases) and linezolid (which inhibits the  
68 ribosome). It is estimated that there were at least 450,000 new cases of MDR-TB worldwide  
69 in 2019, and at least 180,000 deaths from MDR-TB were reported (2). The World Health  
70 Organisation (WHO) has set a goal to eliminate TB by 2035, but this clearly cannot be  
71 achieved without addressing antibiotic resistance. Recent striking progress has been made  
72 towards this: in 2019, the U.S. Food and Drug Administration (FDA) approved a new  
73 combination therapy composed of bedaquiline, pretomanid, and linezolid that able to treat  
74 both MDR- and XDR-TB disease effectively using three novel antibiotics, but with higher  
75 cost and greater side effects than standard first-line therapy (3). There have been no similar  
76 efforts towards improvements in first-line therapy, which is the primary line of defense.  
77 Clearly, retaining or improving the efficacy of the inexpensive first-line drugs for the  
78 treatment of drug-sensitive TB is imperative, as is enhancing their activity where possible to  
79 reduce side effects and thereby improve patient adherence.

80

81 Genome maintenance is essential for bacterial survival. Both transcription and replication  
82 processes inflict stresses that challenge genome topology and integrity. R-loops, which are  
83 RNA/DNA hybrids that form spontaneously in the genome during transcription, are a major  
84 threat to genome stability and can be lethal if not resolved (4, 5) (Fig 1A). Persistent R-loops  
85 can alter DNA topology, block both transcription and replication, and promote double-strand  
86 DNA breaks (DSBs) (6-9). Not all R-loops are pathological, since R-loop formation can be a  
87 necessary intermediate in plasmid replication (10) and in bacterial immune system  
88 surveillance via CRISPR (Clustered Regularly Interspersed Short Palindromic Repeats) (11).  
89 Multiple helicases and endonucleases can contribute to the resolution of these hybrids, but  
90 ribonuclease HI (RNase HI) activity provides the major dedicated function for this, by

91 targeted hydrolysis of the RNA strand in an RNA/DNA hybrid (12). Cells therefore require  
92 precisely controlled levels of RNase HI to prevent dysfunction. Recently it was demonstrated  
93 that loss of RNase HI function in *E. coli* drives the extinction of rifampicin and streptomycin-  
94 resistant strains (13), suggesting that RNase HI might be a promising new antimicrobial  
95 target in light of the current antimicrobial resistance crisis. RNase HI is already a validated  
96 target for HIV therapy: Much progress has been made over the last two decades in the  
97 discovery and optimisation of inhibitors with different binding modes that are specific and  
98 selective to the RNase H activity of HIV-1 RT and that have antiviral activity within cells (14-  
99 16).

100

101 The mycobacteria possess a bifunctional RNase HI enzyme called RnhC that is composed of  
102 an N-terminal domain with RNase HI activity and a C-terminal domain from the acid  
103 phosphatase family. This domain possesses cobalamin-P phosphatase activity (CobC) and is  
104 proposed to be involved in vitamin B<sub>12</sub> biosynthesis (17-20). These domains can function  
105 separately, although the CobC domain confers increased activity on the RNase HI domain of  
106 *M. tuberculosis* RnhC (Rv2228c) (17). The mechanism for this is not understood. Although  
107 most mycobacteria have only one gene encoding RNase HI activity, the non-pathogenic  
108 saprophytic model organism, *M. smegmatis*, also possesses a single-domain RNase HI termed  
109 RnhA in addition to RnhC. Both RNases HI have been well characterised biochemically, as  
110 have single knock-out strains of both *rnhA* and *rnhC* (18, 19, 21), which both grow  
111 indistinguishably from wild type (18, 19). However, simultaneous deletion of both genes is  
112 lethal, indicating the essentiality of RNase HI activity in mycobacteria (18, 19). Transposon  
113 mutagenesis in *M. tuberculosis* located essentiality of function to the RNase HI domain of  
114 RnhC (22) (23). Moreover, *M. tuberculosis rnhC* can rescue *M. smegmatis* from the lethality  
115 of the double knockout of *rnhA* and *rnhC* (20).

116

117 In this study we used the dual RNase HI capacity of *M. smegmatis* provided by RnhA and  
118 RnhC to investigate RNase HI as a novel drug target in mycobacteria. We used single  
119 RNase HI knock-out strains to deplete RNase HI activity, and showed that deletion of RnhC  
120 in particular is sufficient to cause the accumulation of R-loops, and to induce markers of  
121 genome topological stress. Furthermore, deletion of RnhC enhanced the killing activity of  
122 various anti-tubercular drugs, with an especially marked effect on rifampicin activity. We  
123 also identified four small molecules, previously shown to inhibit HIV RNase HI, as  
124 micromolar inhibitors of recombinant *M. tuberculosis* RnhC *in vitro*, that also potentiate

125 rifampicin killing in whole *M. tuberculosis* cells. Together, these results validate RNase HI as  
126 a drug target in the mycobacteria, demonstrate the potential for enhanced therapy by  
127 combining rifampicin treatment with RNase HI inhibitors, and open avenues to rescue  
128 rifampicin-resistant strains for therapy with rifampicin through RNase HI inhibition.

129

## 130 **Materials and methods**

### 131 **Strains, growth conditions and media**

132 Strains and plasmids used in this study are listed in Tables S1 and S2. *E. coli* strains Top10  
133 and BL21(DE3)pLysS, used for cloning and protein expression respectively, were grown in  
134 lysogeny broth (LB) and/or agar at 37°C or 28°C in the presence of the appropriate  
135 antibiotic(s) at the required concentrations *i.e.* 50 µg ml<sup>-1</sup> kanamycin (Goldbio), 100 µg ml<sup>-1</sup>  
136 ampicillin (Goldbio), 200 µg ml<sup>-1</sup> hygromycin (Thermofisher), 5 µg ml<sup>-1</sup> gentamicin  
137 (Goldbio) and 35 µg ml<sup>-1</sup> chloramphenicol (Sigma-Aldrich). *M. smegmatis* mc<sup>2</sup>155 and *M.*  
138 *tuberculosis* H37Rv were grown at 37°C in Middlebrook 7H9 broth (BD) or on Middlebrook  
139 7H10 agar (BD) supplemented with 10% Albumin-Dextrose-Saline, 0.2% glycerol and  
140 0.05% Tween 80 (Sigma) in the presence of appropriate antibiotics at the following  
141 concentrations: 25 µg ml<sup>-1</sup> kanamycin, 50 µg ml<sup>-1</sup> hygromycin and 5 µg ml<sup>-1</sup> gentamicin.

142

### 143 **Plasmid and Strain construction**

144 Plasmids were constructed using standard cloning techniques. Inactivation of *rnh* alleles was  
145 carried out by homologous recombination with suicide plasmids (24) containing alleles  
146 inactivated by insertion of either a hygromycin antibiotic resistance cassette ( $\Delta rnhC$ ) or  
147 kanamycin resistance cassette ( $\Delta rnhA$ ). Allele replacement was confirmed initially by  
148 Southern blot and subsequently by whole-genome sequence analysis. Bioluminescent strains  
149 were constructed by transformation with the integrating plasmid pMV306G13+Lux which  
150 carries the *luxABCDE* operon (25). *M. smegmatis* *rnhA* or *M. tuberculosis* *rnhC* genes for  
151 complementation studies were cloned into the pAL5000-based replicating plasmids (26)  
152 pOLYG or p32GoriM, respectively, to make *prnhA* and *prnhC*. These vector backbones  
153 differ only in the antibiotic resistance cassette, hygromycin or gentamycin respectively (27).  
154 The *M. smegmatis* *rnhA* gene was cloned with 350 bp of upstream region containing its own  
155 promoter (28), and *M. tuberculosis* *rnhC* was expressed from the well-characterised  
156 leaderless Ag85 promoter (29).

157

## 158 **Immunodetection of RNA/DNA hybrid**

159 Bacterial strains were grown as above and harvested at mid-log phase ( $OD_{600} = 1.5$ ). Aliquots  
160 (20 ml) of each culture were harvested and the nucleic acid was extracted using the phenol-  
161 chloroform technique (30) with a slight modification: Following lysozyme treatment, RNase  
162 A (10 $\mu$ g/ml) was added to degrade single-stranded RNA, and small RNAs were precipitated  
163 by 30% (w/v) PEG 8000/30 mM  $MgCl_2$ . Nucleic acid was quantified using a  
164 spectrofluorometric method using QuantiFluor® dsDNA (Thermofisher). Nucleic acid (400  
165 ng) was spotted on to Amersham Hybond N+ nylon membrane (GE Healthcare Lifesciences),  
166 air-dried and UV cross-linked for 3 min using a transilluminator. Control aliquots were pre-  
167 incubated with 10 U of *E. coli* RNase H (NEB) for two hours at 37 °C before spotting. The  
168 membrane was blocked in TBST (20mM Tris pH 7.4, 150mM NaCl and 0.1% (v/v) Tween  
169 20) containing 5% (w/v) milk powder at room temperature for 1 hour. The blocking solution  
170 was removed and replaced with fresh TBST containing 5% (w/v) milk and S9.6 anti-DNA-  
171 RNA Hybrid Antibody (Kerafast) at 1 $\mu$ g/ml and incubated at 4°C overnight. The following  
172 day, the membrane was washed (3 x 5 min) with fresh TBST, and finally incubated with  
173 1:1000 dilution of HRP-conjugated anti-mouse secondary antibodies (Invitrogen) in TBST  
174 for 1 hour at room temperature. Unconjugated secondary antibody was removed by washing  
175 (3 x 5 min) with fresh TBST, and developed with West Pico PLUS Chemiluminescent  
176 Substrate (Thermofisher) according to manufacturer instructions. Chemiluminescence was  
177 detected using an Amersham Imager 600, and dot intensity was quantified using the Image  
178 Lab software suite (BioRad). Student's unpaired *t*-test, calculated using GraphPad Prism was  
179 used to test for significance.

180

## 181 **$\beta$ -galactosidase reporter assay**

182 Cultures of *M. smegmatis* mc<sup>2</sup>155 and  $\Delta$ rnhC were grown as above and harvested at mid-log  
183 phase. Optical density was used for normalisation of  $\beta$ -galactosidase activity. The assay was  
184 carried out according to Miller with variations (31, 32). Briefly, aliquots (2 ml) from each  
185 culture were harvested and resuspended in Z-buffer (60mM  $Na_2HPO_4$ , 40mM  $NaH_2PO_4$ ,  
186 10mM KCl, 1mM  $MgSO_4$ , 50 mM  $\beta$ -mercaptoethanol) to a final volume of 600 $\mu$ l. Cells were  
187 permeabilized by adding 100 $\mu$ l of chloroform and 50  $\mu$ l of 0.1% SDS, and the mixture was  
188 incubated at 28°C for 5 minutes. Then 200 $\mu$ l of ONPG (4 mg/ml) was added to the mixture,  
189 which was incubated at 28°C until sufficient yellow colour developed, and time of incubation  
190 was recorded. The reaction was stopped by the addition of 500 $\mu$ l of 1 M  $Na_2CO_3$  then the  
191 mixture was centrifuged at 10 000 g for 2 min. The  $OD_{420}$  of the supernatant was measured



192 and the  $\beta$ -galactosidase activity was expressed in Miller Units using the following equation:  
193  $OD_{420}(1000)/(tv) OD_{600}$ , where  $t$  = incubation time (min) and  $v$  = volume of culture (ml).  
194 The Student's unpaired t-test embedded in GraphPad Prism software was used to test for  
195 significance.

196

## 197 **Growth inhibition assays**

### 198 *M. smegmatis*

199 Two different methods were used to assess growth inhibition.

200

### 201 **Agar proportion method**

202 *M. smegmatis* strains were grown and harvested at mid-log phase ( $OD_{600} = 1$  to 1.5). A  
203 single-cell suspension was prepared by centrifugation of the culture at 2,000 x g for 10 min to  
204 pellet clumps, the supernatant was collected, and 20% glycerol was added. Aliquots were  
205 frozen with liquid nitrogen and stored at -80 °C. For killing assay, 150 CFU were plated in  
206 Middlebrook 7h10 agar plates containing two-fold serial dilutions of rifampicin and isoniazid  
207 and incubated at 37°C for 3 days. Bacterial survival at each concentration was assessed and  
208 MIC determination was calculated from non-linear regression analysis using GraphPad  
209 Prism. Significant differences were assessed using the Student's unpaired t-test embedded in  
210 GraphPad Prism software.

211

### 212 **Bioluminescence reporter assay**

213 Bacterial strains carrying pMV306G13+Lux were grown as above to mid-log phase ( $OD_{600} =$   
214 1.5), and diluted 30-fold to  $OD_{600} = 0.05$ . All assays were set up in 96 well plates (Greiner  
215 Bio-One) in a total volume of 100 $\mu$ L where 50 $\mu$ L of the diluted culture was added to 50 $\mu$ L of  
216 two-fold serially diluted antibiotics in Middlebrook 7H9 media. Two controls were added,  
217 bacteria only and media only. The plates were covered with lids, sealed with parafilm to  
218 prevent evaporation, and were incubated at 37°C for 18 hours. Bioluminescence was  
219 quantified using a SpectraMax iD3 Plate Reader. Bacterial survival at each concentration was  
220 calculated based on the ratio of the RLU in the presence or absence of the inhibitor. Dose  
221 response curves and the  $MIC_{50}$  for each drug was determined by fitting the data to log  
222 (inhibitor) vs. response – variable slope equation using GraphPad Prism 7. The Student's  
223 unpaired t-test embedded in GraphPad Prism software was used to test for significant  
224 differences in the killing between wild type and  $\Delta rnhC$ .



225

## 226 *M. tuberculosis*

227 *M. tuberculosis* mc<sup>2</sup>6230 ( $\Delta RD1 \Delta panCD$ ) (33) was grown in Middlebrook 7H9 broth  
228 supplemented with OADC (0.005 % oleic acid, 0.5 % bovine serum albumin, 0.2 % dextrose,  
229 0.085 % catalase), 0.05 % tyloxapol and 25  $\mu\text{g mL}^{-1}$  pantothenic acid (PAN) at 37 °C. The  
230 assay was carried out in 96 well plates in a total volume of 100 $\mu\text{L}$ . The cultures were diluted  
231 to  $\text{OD}_{600} = 0.05$  and 50 $\mu\text{L}$  of the diluted culture was added to 50 $\mu\text{L}$  of two-fold serially  
232 diluted inhibitor in Middlebrook 7H9 media. Plates were incubated without shaking at 37 °C  
233 for 7 days before the minimal inhibitory concentrations that inhibited 90% of growth ( $\text{MIC}_{90}$ )  
234 were determined from the visual presence or absence of growth in biological triplicates. The  
235 fractional inhibitory concentration index (FICI) was determined for RNase HI inhibitors in  
236 combination with rifampicin by the addition of a sub-MIC concentration of rifampicin (5 nM)  
237 to the MIC assay. FICI values were calculated using the equation  $\text{FICI} = \text{FIC}_A + \text{FIC}_B =$   
238  $(C_A/\text{MIC}_A) + (C_B/\text{MIC}_B)$ , where  $\text{MIC}_A$  and  $\text{MIC}_B$  are the MICs of drugs A and B alone, and  
239  $C_A$  and  $C_B$  are the concentrations of the drugs in combination.

240

## 241 Recombinant RnhC purification

242 The *RnhC/Rv2228c* open reading frame (ORF) was amplified from *M. tuberculosis* DNA and  
243 cloned into pMAL-C2 (34) as an N-terminal maltose-binding protein (MBP) fusion construct  
244 which was further modified to include a 6xHis-tag following the MBP ORF and a 3C  
245 protease recognition sequence (35) immediately upstream of *RnhC*. The plasmid was  
246 transformed into *E. coli* BL21(DE3) pLysS (36). Cultures grown in ZYP-5052 medium (37)  
247 were auto-induced by incubation for 7 hr at 37 °C followed by incubation at 28 °C for 20 hr.  
248 The cells were harvested (5,300 x g for 30 min at 4 °C) and re-suspended in lysis buffer (20  
249 mM HEPES and 150 mM NaCl, pH 7.5) containing 10 $\mu\text{g/ml}$  of DNase 1 and complete Mini  
250 EDTA-free protease inhibitor tablets (Roche) (one tablet/10ml total volume). The cells were  
251 lysed using a French press cell disruptor (ConstantSystem) at a pressure of 18 kpsi. The  
252 lysate was centrifuged at 20,000 x g for 30 min at 4 °C. Recombinant protein was purified by  
253 affinity chromatography using an amylose column, and cleaved from the tags (MBP and 6X-  
254 His) using His-tagged recombinant 3C protease (38) overnight at 4 °C. The 3C protease and  
255 the tags were removed by reverse affinity chromatography. Recombinant Mt RnhC was  
256 concentrated and further purified by size exclusion chromatography using a

257 16/600Superdex® 200 pg columns (GE Healthcare). Mt RnhC eluted in a single peak and the  
258 fractions were pooled, concentrated to 10 mg.ml<sup>-1</sup> and stored at -20°C.

259

### 260 **HIV-RNase HI Inhibitors**

261 HIV RNase H inhibitors were selected from the PubChem database and kindly provided by  
262 the National Institutes of Health (NIH) through the Developmental Therapeutics Programme  
263 (DTP). The compounds were resuspended in DMSO at a final concentration of 10 mM and  
264 stored at -20°C.

265

### 266 **RNase HI inhibition assay**

267 The RNase HI activity assay was performed using a Fluorescence Resonance Energy Assay  
268 (FRET) as previously described in (39) using an 18bp RNA/DNA , where the RNA strand  
269 was labelled with fluorescein on the 3'-end (5'-GAU CUG AGC CUG GGA GCU-  
270 fluorescein-3' ) and the complementary DNA strand labelled with Iowa black on the 5'-end  
271 (5' -Iowa black-AGC TCC CAG GCT CAG ATC-3'). Mt RnhC (4nM) was incubated with  
272 25nM of substrate in FRET buffer (50 mM Tris-HCl, pH 8, 60 mM KCl, 5mM MgCl<sub>2</sub>). The  
273 increase in fluorescein signal due to substrate hydrolysis was monitored at an  
274 excitation/emission of 490nm/528nm using a SpectraMax iD3 Plate Reader. Compounds  
275 active at an initial inhibitor concentration of 100 µM were subsequently assessed using a dose  
276 response assay. Drug dose-response curves and IC<sub>50</sub> determinations were carried out by non-  
277 linear regression analysis in GraphPad Prism 7.

## 278 Results

### 279 Loss of RnhC induces markers of DNA topology stress in *M. smegmatis*

280 As a first indicator of whether depletion of RNase HI activity affected genome maintenance,  
281 we looked at the expression of topoisomerases responsible for topology control. In  
282 metabolically active cells, R-loops can stall RNA polymerase complexes and increase  
283 topological stress in the genome because persistent R-loops prevent the resolution of both the  
284 negative DNA supercoiling that is formed in the wake of an RNA polymerase, and the  
285 positive DNA supercoiling that is generated ahead of it (40, 41) (**Figure 1A**). Both the DNA  
286 gyrase and topoisomerase I promoters in *M. smegmatis* respond directly to the topological  
287 stresses experienced by the chromosome since RNA polymerase binding elements in each  
288 promoter adopt optimal conformations for transcription if the DNA is either overwound  
289 (gyrase)(42), or underwound (topoisomerase I) (43). An increase in the expression of both  
290 promoters simultaneously would therefore indicate topological stress in the chromosome  
291 consistent with the presence of persistent R-loops. We fused these promoters to a *lacZ*  
292 reporter gene and integrated these reporter cassettes into the *attB* site of the chromosomes of  
293 both wild-type and  $\Delta rnhC$  *M. smegmatis* strains. Reporter activity from gyrase and  
294 topoisomerase promoters was increased in the  $\Delta rnhC$  strain compared to wild-type, by 3-fold  
295 and 1.7-fold respectively ( $p < 0.05$ ) (**Figure 1B**). Notably, these increases in activity were  
296 abolished in the complemented knockout strain, suggesting that chromosomal R-loops were  
297 indeed effectively processed by the complementing *rnhC* gene provided *in trans*.

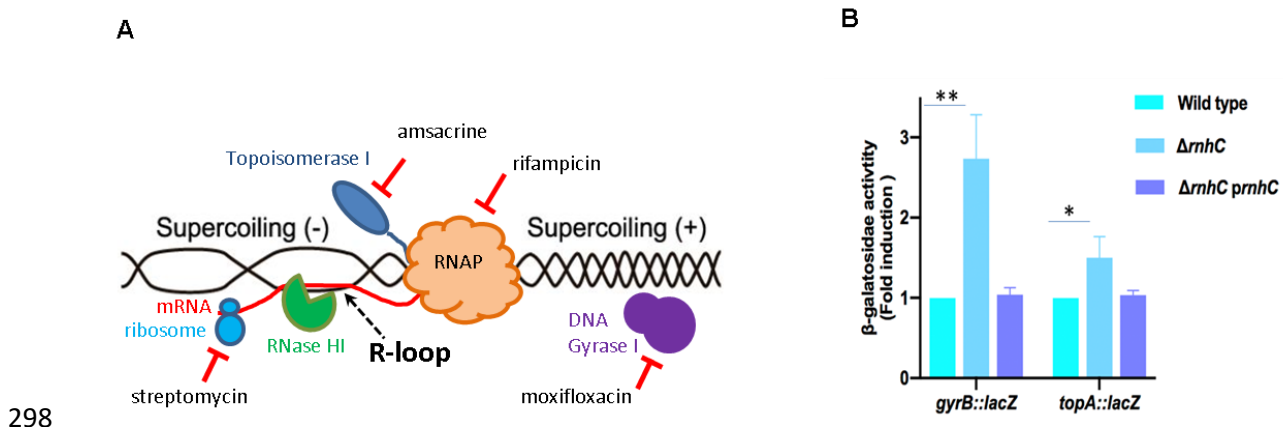

299 **Figure 1. A.** Twin domain model of transcription and location of enzymes (and their inhibitors) involved in  
300 topological modification or R-loop metabolism. RNAP: RNA polymerase I. **B.** Expression of gyrase (*gyrB*) and  
301 topoisomerase I (*topA*) promoters fused to *lacZ* in wild type,  $\Delta rnhC$  and complemented strains of *M. smegmatis*  
302 *mc*<sup>2</sup>155. The relative activities of the  $\beta$ -galactosidase reporters are shown, normalized to the wild type. Data  
303 shown are representative of the average of three independent experiments with standard deviations indicated by  
304 error bars. The statistical significance of the differences assessed using Student's unpaired *t*-test calculated by  
305 GraphPad Prism 7. \*,  $P < 0.05$ ; \*\*,  $P < 0.01$ .

306

307  
308  
309  
310  
311  
312  
313  
314  
315  
316  
317  
318  
319  
320  
321

### Loss of either *rnhA* or *rnhC* results in R-loop accumulation in *M. smegmatis*.

To quantify R-loops in the RNase HI depletion strains, we isolated total nucleic acid from cultures of both  $\Delta rnhA$  and  $\Delta rnhC$  strains grown to mid-log phase and quantified the relative amounts of R-loops in each, using South-Western blots with a monoclonal antibody specific for DNA:RNA hybrids (44). The specificity of the antibody for RNA:DNA hybrids was confirmed by subjecting samples to RNase HI digestion prior to detection and noting the loss of signal (**Figure 2A**). R-loops were detected at low levels in the parental strain, and accumulated in the  $\Delta rnhA$  mutant by a factor of  $\sim 2$ -fold, and in the  $\Delta rnhC$  mutant by a factor of  $\sim 11$ -fold (**Figure 2B**). This indicated that both RnhA and RnhC act as part of a protective system to remove R-loops in replicating and actively transcribing cells. In both cases, the accumulation of R-loops also indicated that neither the remaining RNase HI isoform, nor other potential hybrid removal mechanisms such as the DNA helicase RecG (45), are able to compensate fully for the loss of either RNase HI enzyme.

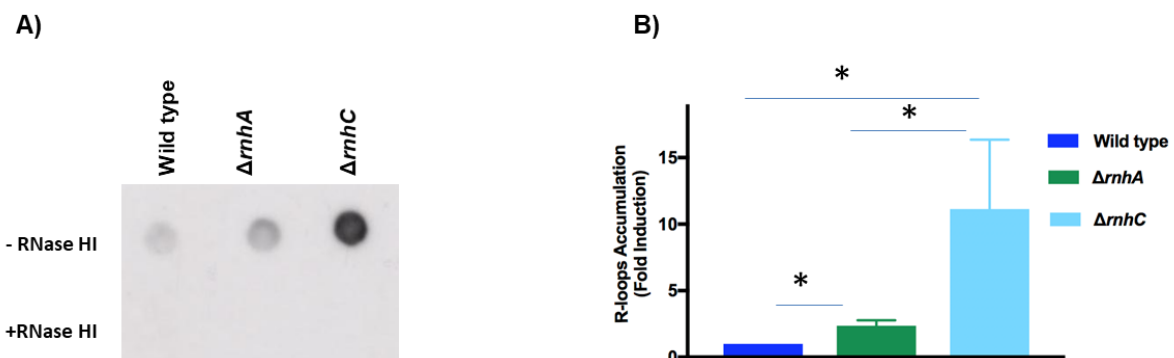

322  
323  
324  
325  
326  
327  
328  
329  
330  
331

**Figure 2.** R-loop quantitation in wild type,  $\Delta rnhA$  and  $\Delta rnhC$  strains of *M. smegmatis* mc<sup>2</sup>155. **A.** Dot-blot analysis of R-loop accumulation: total nucleic acid from each strain was spotted onto the membrane and detected using a RNA:DNA hybrid-specific monoclonal antibody. Controls (+RNase HI) were treated with *E. coli* RNase HI before spotting. **B.** The amounts of R-loops in the wild type,  $\Delta rnhA$ , and  $\Delta rnhC$  strains were quantitated using Image Lab (BioRad). Relative amounts are shown normalized to the wild type. Data shown are representative of the average of three independent experiments with standard deviations indicated by error bars. The statistical significance of the differences are assessed using Student's unpaired *t*-test calculated by GraphPad Prism 7. \*, *P* < 0.05

332  
333  
334  
335  
336

### Plasmid replication exacerbates the R-loop burden in the *M. smegmatis* $\Delta rnhC$ strain.

To confirm that loss of RNase HI activity was responsible for the observed increase in the number of R-loops in the  $\Delta rnhA$  and  $\Delta rnhC$  strains, we tested whether either *rnhA* or *M. tuberculosis* *rnhC* provided *in trans* could complement the  $\Delta rnhA$  and the  $\Delta rnhC$  mutants,

337 respectively (**Figure S1 A/B**). As expected, complementation with the plasmid-borne *rnhA*  
338 gene reduced levels of R-loops in  $\Delta rnhA$  to a wild-type level. In contrast, introduction of a  
339 plasmid carrying *rnhC* into the  $\Delta rnhC$  strain conferred a 3-fold *increase* of R-loops over  
340  $\Delta rnhC$  without plasmid. A similar effect was obtained by transforming the  $\Delta rnhC$  strain with  
341 the plasmid containing *rnhA*, or with vector containing the *cobC* domain only (**Figure S1C**).  
342 This suggested that the increase in R-loops was a function of plasmid carriage in  $\Delta rnhC$ , and  
343 possibly unrelated to plasmid cargo.

344

345 We carried out whole genome sequencing of the  $\Delta rnhC$  strain complemented with *rnhC*  
346 which determined that this strain was isogenic to  $\Delta rnhC$ , except for the plasmid, and that the  
347 plasmid was present at between 24-48 copies per cell. Typically, pAL5000-based plasmids  
348 are present at 3-5 copies per cell (46), but a high copy number variant has been isolated. No  
349 mutations were found in the plasmid compared to the published sequence that could account  
350 for the increased copy number (47). This suggested that loss of RnhC activity affected  
351 plasmid copy number in *M. smegmatis* through a physical rather than genetic mechanism.  
352 Since the chromosomally-located reporters *gyrB::lacZ* and *topA::lacZ*, showed wild-type  
353 levels of topoisomerase activity in  $\Delta rnhC$  *prnhC*, but only report on the topology status of the  
354 chromosome, we concluded that the increased number of R-loops detected in the  
355 complemented  $\Delta rnhC$  strain must therefore be plasmid-borne. It is possible that increased  
356 hyper-negative supercoiling of the plasmid, either through localised transcription effects (48)  
357 and/or titration of RNase HI activity to the chromosome (49), may have affected binding  
358 efficiencies of some of the proteins involved in plasmid replication, resulting in increased  
359 initiation frequencies, as well as promotion of R-loop formation.

360

361 Regardless of the precise mechanism, since the chromosomal DNA topology stress resulting  
362 from loss of *rnhC* could be fully complemented, we concluded that the plasmid copy number  
363 was well suited to the cellular requirements for RNase HI activity, and the supercoiling status  
364 of the plasmid might even reflect a useful cellular feedback mechanism to titrate the level of  
365 RNase HI appropriately. For these reasons, subsequent experiments were carried out using  
366 these constructs and strains. The contrasting behaviour of the complemented  $\Delta rnhA$  and  
367  $\Delta rnhC$  strains also underscored the different physiological consequences of the loss of *rnhA*  
368 *versus* *rnhC* which may be a function of the severity of R-loop accumulation.

369

370 **Inhibition of transcription by low levels of rifampicin unexpectedly increases the**  
371 **accumulation of R-loops.**

372 Since transcription is a prerequisite for R-loop formation, we hypothesized that  
373 transcriptional inhibition would reduce the number of R-loops in the cell. Rifampicin inhibits  
374 transcription at the initiation step and does not affect RNA polymerase complexes that have  
375 added more than three ribonucleotides from proceeding to active transcription (50).

376

377 We exposed mid-log phase cultures of wild-type and  $\Delta rnhC$  strains of *M. smegmatis* to  
378 rifampicin for 1 hour before harvesting the cells and quantitating the R-loops present in them.  
379 Rifampicin at a concentration equivalent to the MIC<sub>90</sub> value for *M. smegmatis* (4.2  $\mu\text{M}$  or  
380 3.5  $\mu\text{g.ml}^{-1}$ ) abolished R-loops, a result consistent with complete inhibition of transcription  
381 (**Figure 3**). Surprisingly, both the wild-type and  $\Delta rnhC$  strains contained significantly  
382 increased amounts of R-loops when exposed to a concentration of rifampicin equivalent to  
383 the MIC<sub>50</sub> value (1.2  $\mu\text{M}$  or 1  $\mu\text{g.ml}^{-1}$ ). A pronounced response to rifampicin exposure was  
384 shown by the  $\Delta rnhC$  strain, with the number of R-loops increasing by ~3-fold compared to  
385 the non-treated  $\Delta rnhC$  strain. Strikingly, even at a rifampicin concentration equivalent to  
386 MIC<sub>25</sub> (0.6  $\mu\text{M}$  or 0.5  $\mu\text{g.ml}^{-1}$ ), more R-loops accumulated in  $\Delta rnhC$  cells compared to  
387 untreated cells, indicating an overload of the cellular systems required for R-loop resolution.  
388 This also suggested that the low number of R-loops observed in wild-type cells at this  
389 rifampicin concentration was not due to lack of R-loop formation, but rather was reflective of  
390 efficient resolution by RNase HI. Notably, R-loop resolution is clearly impaired even in wild-  
391 type cells exposed to rifampicin at the MIC<sub>50</sub>. These results indicate that under these  
392 conditions, sub-lethal concentrations of rifampicin cause R-loop accumulation, a  
393 phenomenon that has not previously been described, and is opposite to the effect of a lethal  
394 concentration of rifampicin.

395

396



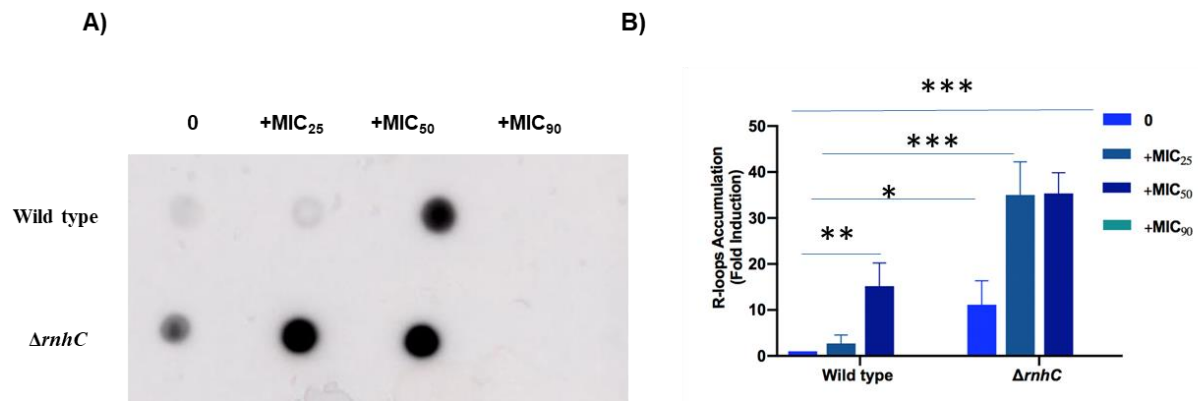

397

398 **Figure 3.** R-loop quantitation in wild-type and  $\Delta rnhC$  strains of *M. smegmatis* mc<sup>2</sup>155 after exposure to various  
399 concentrations of rifampicin. **A.** Dot blot analysis of R-loop formation. **B.** Quantification of R-loops observed in  
400 the dot blot, normalized to the wild type strain in the absence of rifampicin. Data shown are representative of the  
401 average of three independent experiments with standard deviations indicated by error bars. The statistical  
402 significance of the differences assessed using Student's unpaired *t*-test calculated by GraphPad Prism 7.  
403 \*, *P* < 0.05; \*\*, *P* < 0.01; \*\*\*, *P* < 0.001

404

#### 405 **Loss of RNase HI is synergistic with transcriptional inhibition.**

406 To better understand the cellular consequences of rifampicin-induced R-loop accumulation,  
407 we carried out a dose-response assay to assess the extent to which RNase HI contributes to  
408 the survival of cells exposed to rifampicin. We found that wild-type *M. smegmatis* is  
409 inhibited as expected by previously established concentrations of rifampicin (51, 52). In  
410 contrast, loss of *rnhC* strongly sensitised the knock-out strain to rifampicin, reducing the  
411 MIC<sub>50</sub> almost 100-fold, from 1.2  $\mu$ M to 18 nM (**Figure 4A**). This sensitivity was fully  
412 complemented by the provision of *rnhC* *in trans*. To confirm that this remarkable loss of  
413 viability under rifampicin stress is due to the loss of the RNase HI domain rather than the  
414 CobC domain of RnhC, which is involved in vitamin B<sub>12</sub> biosynthesis (20), the assay was  
415 repeated in the presence of vitamin B<sub>12</sub> in the growth medium. Supplementation with vitamin  
416 B<sub>12</sub> altered the MIC<sub>50</sub> slightly, but not significantly, from 18nM to 30nM, (**Figure 4A**),  
417 indicating that the rifampicin sensitisation was due to the depletion of RNase HI function.

418

419 As the  $\Delta rnhA$  strain of *M. smegmatis* showed a smaller accumulation of R-loops than the  
420  $\Delta rnhC$  strain (**Figure 2**), we asked whether the loss of RnhA could also confer increased  
421 sensitivity to rifampicin. *M. smegmatis*  $\Delta rnhA$  showed a ~3-fold increase in sensitivity to  
422 rifampicin compared to wild-type, which was fully complemented by the provision of *rnhA* *in*  
423 *trans* (**Figure 4B**). Together, these findings indicated that depletion of RNase HI activity was  
424 responsible for the increased sensitivity of *M. smegmatis* to transcriptional inhibition, and that  
425 loss of RnhA had a smaller contribution to this phenotype than the loss of RnhC. In fact, it



426 was remarkable that such an apparently small contribution to R-loop metabolism still  
427 conferred synergy with rifampicin, underscoring the vulnerability of mycobacterial cells to  
428 even small amounts of RNase HI depletion.  
429

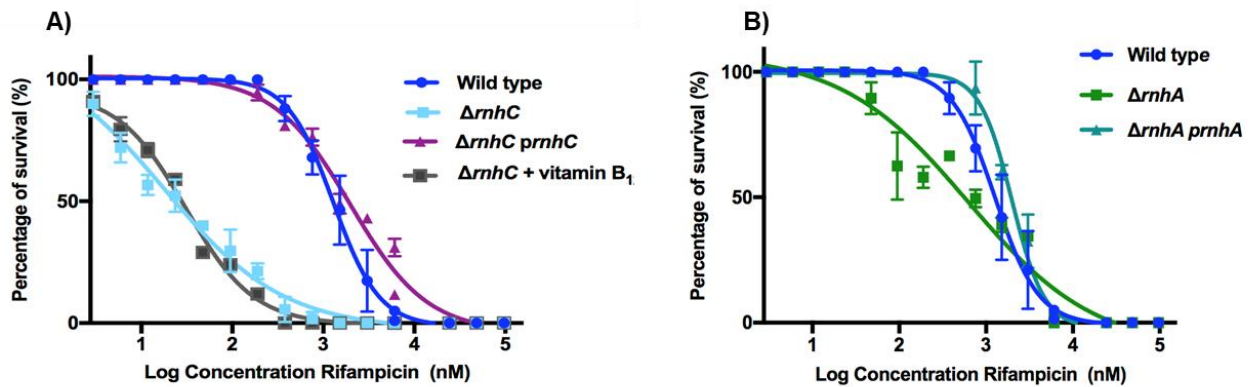

430

431 **Figure 4:** Dose-response curves of rifampicin killing in **A)** wild-type,  $\Delta rnhC$  and **B)**  $\Delta rnhA$  strains of  
432 *M. smegmatis* mc<sup>2</sup>155 and the respective complemented strains. Data shown are representative of the average of  
433 three independent experiments with standard deviations indicated by error bars. Vitamin B<sub>12</sub> was included in the  
434 growth medium at 10  $\mu\text{g}\cdot\text{ml}^{-1}$ .  
435

#### 436 **Loss of RNase HI also sensitizes *M. smegmatis* to moxifloxacin and streptomycin.**

437 R-loop formation can also be affected by uncoupling transcription and translation (53, 54), or  
438 by altering DNA supercoiling in the genome (5, 55). Therefore, we tested the sensitivity of  
439 the *M. smegmatis*  $\Delta rnhC$  strain to streptomycin (an inhibitor of translation), ampicillin (a  
440 topoisomerase I inhibitor) and moxifloxacin (a DNA gyrase inhibitor) (**Figure 1A**). As a  
441 control, we investigated the sensitivity of the  $\Delta rnhC$  strain to isoniazid, which disrupts  
442 mycobacterial cell wall synthesis by inhibiting mycolic acid synthesis (56).

443

444 The loss of the *rnhC* gene significantly reduced the MIC<sub>50</sub> for streptomycin, from 31 nM in  
445 the wild-type to 17 nM in the  $\Delta rnhC$  strain ( $P < 0.05$ ), and to moxifloxacin, from 194 nM to  
446 62 nM (**Figure 5A,B**). ( $P < 0.05$ ). In contrast, the loss of *rnhC* did not result in a significant  
447 increase in the sensitivity of *M. smegmatis* to ampicillin (MIC<sub>50</sub> = 160  $\mu\text{M}$  for the wild-type  
448 and 140  $\mu\text{M}$  for the  $\Delta rnhC$  strain,  $P > 0.05$ ) (**Figure 5C**). As expected, the loss of the *rnhC*  
449 gene did not significantly affect the MIC<sub>50</sub> to isoniazid (85 $\mu\text{M}$  for wild-type and 63  $\mu\text{M}$  for  
450 the knock-out strain,  $P > 0.05$ ) (**Figure 5D**).

451

452 Taken together, these results suggest that RNase HI inhibition would improve the efficacy of  
453 rifampicin, streptomycin and moxifloxacin in a synergistic manner. In all cases, the increase  
454 in efficacy arising from RNase HI depletion was more pronounced at sub-MIC concentrations  
455 of antibiotic, which is consistent with a requirement for some transcription to occur for the  
456 effect to be seen.

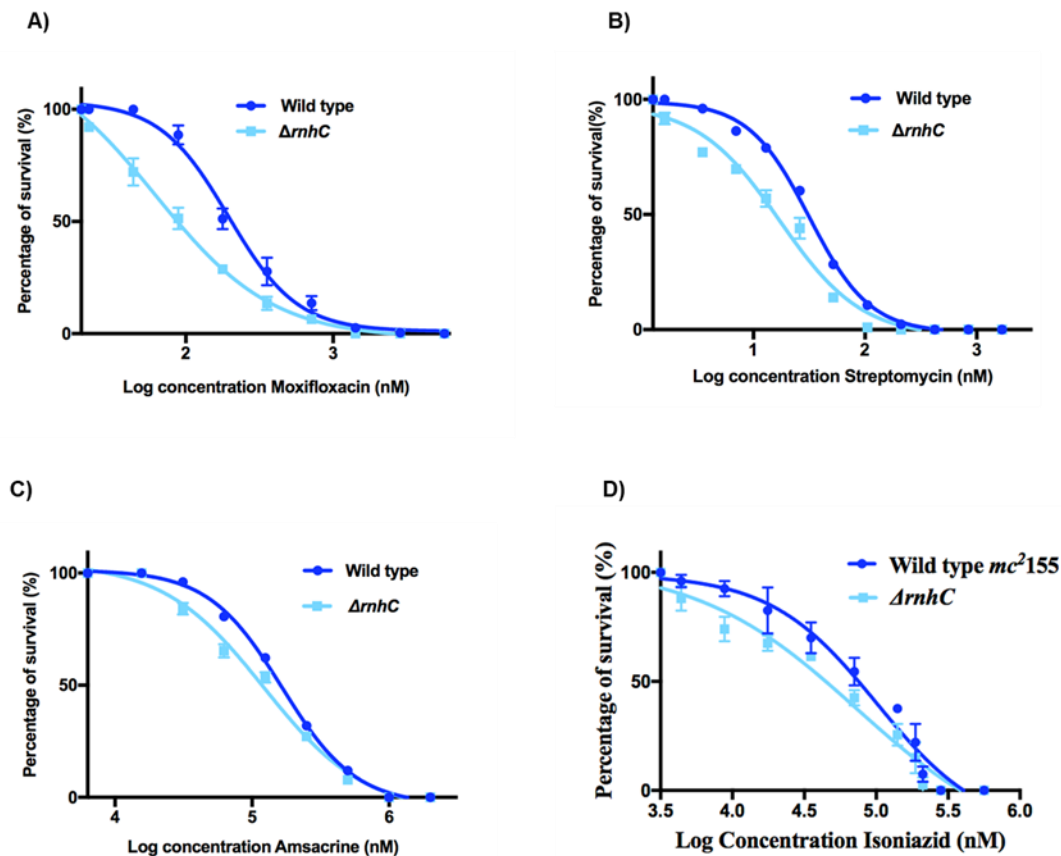

457

458 **Figure 5.** Dose-response curves of antibiotic killing for A) streptomycin, B) moxifloxacin, C) amsacrine and D)  
459 isoniazid in wild-type and  $\Delta rhC$  strains of *M. smegmatis* mc<sup>2</sup> 155. Data shown are representative of the average  
460 of three independent experiments with standard deviations indicated by error bars.  
461

#### 462 **Drug candidates with diverse scaffolds inhibit recombinant *M. tuberculosis* RNase HI.**

463 The enhanced antibiotic activity observed when RNase HI activity is depleted in  
464 *M. smegmatis* indicated that RNase HI inhibition is likely to be compatible with existing  
465 antibiotics used for *M. tuberculosis* therapy. Effective RNase HI inhibitors would be of  
466 particular interest as synergistic partners for rifampicin, which is a key first-line antibiotic  
467 used to treat tuberculosis. Rifampicin is a powerful inducer of hepatic cytochrome P450  
468 enzymes, which leads to antagonistic interactions with many other drugs (57). Hence, any  
469 drug that sensitizes *M. tuberculosis* to rifampicin also has the potential to improve therapeutic  
470 outcomes by decreasing the dose of rifampicin required.

471

472 Recently, specific inhibition of HIV RNase HI was reported (14-16), preventing viral  
473 replication in cells, and supporting the possibility that small molecule compounds could be  
474 similarly discovered for bacterial RNases HI. The drug discovery effort against HIV  
475 RNase HI has identified promiscuous chemical scaffolds that not only have activity on HIV  
476 RNase HI *in vitro*, but also have activity on *E. coli* RNase HI or human RNase HI. We  
477 therefore selected a small library of 33 inhibitors of the RNase H activity of HIV-1 RT (**Table**  
478 **S3**) which we screened for activity against recombinant *M. tuberculosis* RNase HI. Ten  
479 compounds were found to inhibit *M. tuberculosis* RNase HI at a concentration less than  
480 100 $\mu$ M (**Table S3**).

481

#### 482 **Rifampicin synergy in whole-cell screens can eliminate off-target compounds.**

483 The ten most effective inhibitors of *M. tuberculosis* RNase HI *in vitro* were then tested for  
484 their antimicrobial activity against *M. tuberculosis* in a growth inhibition assay. All showed  
485 weak or no growth inhibition of *M. tuberculosis* when tested alone, which could be consistent  
486 with their modest inhibition of RNase HI *in vitro*, or with off-target activity. However, we  
487 hypothesised that on-target inhibition of *M. tuberculosis* RNase HI *in vivo* would phenocopy  
488 the genetic depletion of RNase HI observed in *M. smegmatis*, by increasing the sensitivity of  
489 *M. tuberculosis* to sub-MIC<sub>50</sub> concentrations of rifampicin. Four compounds (NSC353720,  
490 NSC600285, NSC18806, and NSC99726) significantly potentiated killing of *M. tuberculosis*  
491 by sub MIC rifampicin indicating that they are likely to be inhibiting RNase HI *in vivo*  
492 (**Figure 6A and Table 1**). *In vitro* dose-response curves against *M. tuberculosis* RNase HI  
493 show that NSC353720 (IC<sub>50</sub> = 14  $\mu$ M) was the most potent inhibitor, while NSC99726 was  
494 the weakest inhibitor (IC<sub>50</sub> = 45  $\mu$ M) of this compound set (**Figure 6B**).

495

496

497

498

499

500

501

502 **Table 1.** Inhibition of *M. tuberculosis* RNase HI recombinant protein and *M. tuberculosis* whole cells  
 503 by *M. tuberculosis* RNase HI inhibitors and their interaction with rifampicin.  
 504

|           | <i>M. tuberculosis</i><br>RnhC IC <sub>50</sub> (μM) | <i>M. tuberculosis</i> MIC <sub>90</sub> (μM) |                               |        |
|-----------|------------------------------------------------------|-----------------------------------------------|-------------------------------|--------|
|           |                                                      | Compound alone                                | Compound with 5 nM Rifampicin | FICI#  |
| NSC353720 | 12                                                   | >512                                          | 64                            | 0.3125 |
| NSC353681 | 17                                                   | 256                                           | 256                           | 2      |
| NSC600285 | 17                                                   | 512                                           | 64                            | 0.375  |
| NSC600286 | 32                                                   | 64                                            | 64                            | 2      |
| NSC143101 | 0.4                                                  | 256                                           | 128                           | 0.75   |
| NSC18806  | 32                                                   | >512                                          | 128                           | 0.5    |
| NSC99726  | 45                                                   | 512                                           | 64                            | 0.375  |
| NSC80693  | 11                                                   | 256                                           | 256                           | 1      |
| NSC51535  | 2.8                                                  | >512                                          | 512                           | 1      |
| NSC117949 | 29                                                   | >512                                          | 512                           | 1      |

505 # Interpretation of FICI: The cut off for synergistic effect is  $\leq 0.5$ , cut off for additive or indifferent effect is  
 506 FICI  $>0.5$  and  $<2$  and cut off for antagonistic effect is FICI  $>2$ .  
 507  
 508  
 509  
 510  
 511

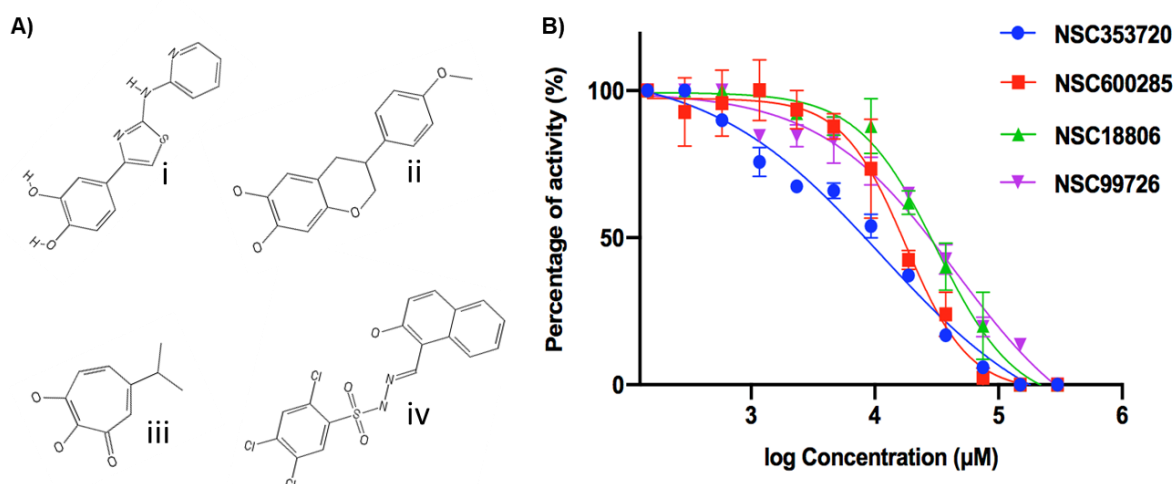

512  
 513 **Figure 6.** Chemical structures (A) and dose-response curves (B) for NSC353720 (i), NSC600285 (ii),  
 514 NSC18806 (iii) and NSC99726 (iv) against recombinant *M. tuberculosis* RNase HI. Data shown are the average  
 515 of two independent experiments with standard deviations indicated by error bars

## 516 Discussion

517 R-loops are genotoxic stresses for all cells and the resolution of these structures is critical for  
518 cell survival. RNase HI is the primary enzyme that resolves R-loops, although cells have  
519 evolved multiple mechanisms to reduce their occurrence or to repair them. In *M. tuberculosis*,  
520 RNase HI activity is essential for the growth of the bacterium *in vitro*, which makes it a  
521 potential drug target. Nevertheless, not much is known about the cellular consequences of  
522 RNase HI inhibition in the mycobacteria. In this study, we showed for the first time that  
523 depletion of RNase HI activity in *M. smegmatis* caused an accumulation of R-loops. Loss of  
524 *rnhC* had a greater effect on R-loop accumulation than loss of *rnhA*.

525

526 The involvement of RnhC, and to a lesser extent RnhA, in the resolution of R-loops in  
527 *M. smegmatis* indicates that both enzymes are part of a protective system to remove the  
528 RNA/DNA hybrids that form spontaneously in the genome during transcription, before they  
529 induce DNA damage. The ability of *M. tuberculosis rnhC* to fully complement the  $\Delta rnhC$   
530 phenotype in *M. smegmatis* strongly suggests that RnhC carries out the equivalent role in  
531 both bacteria. Our data is consistent with previous reports that showed loss of RNase HI  
532 activity in *Bacillus subtilis* (58), *Saccharomyces cerevisiae* (59, 60) or human cells (61)  
533 resulted in the accumulation of R-loops. R-loop formation is favoured by high G+C content,  
534 G/C skew and is promoted by G4 quadruplex structures. Although sites susceptible to R-loop  
535 formation have not yet been mapped in the mycobacteria, over 10,000 sites for G4-  
536 quadruplexes in the *M. tuberculosis* genome have been predicted (62). The high (>65%) GC  
537 content of the mycobacterial genomes is likely to favour both the formation and the  
538 persistence of R-loops. If mycobacteria are more prone than other bacteria to R-loop  
539 formation due to their high GC content, this could account for the essential nature of  
540 RNase HI in the mycobacteria since R-loops promote replication-transcription collisions (6,  
541 7, 9, 58, 63), DNA recombination (6, 59, 64-66), DSBs (9, 66-68), and gene silencing.

542

543 The striking finding that low levels of transcriptional inhibition promote R-loop accumulation  
544 gives new insight into R-loop metabolism in general. It is well established that polymerases  
545 which stall or backtrack during transcription are susceptible to forming R-loops (40, 41, 69-  
546 71), and that R-loops formation is able to stall a translocating polymerases. The “twin  
547 domain” model of transcription shows that DNA in the wake of RNA polymerase becomes  
548 negatively supercoiled (*i.e.* underwound) and that DNA ahead of it becomes positively  
549 supercoiled (*i.e.* overwound) (72-74). Hence, in actively transcribed genes which contain

550 multiple polymerase complexes, the wake of unwound DNA from one polymerase is  
551 rewound by the following enzyme, thus reducing the need for topology-modifying enzymes  
552 and protecting this inter-polymerase region of DNA from R-loop formation (**Figure 7A**).  
553 Thus a topological balance exists in the DNA between actively transcribing RNA  
554 polymerases, which is disrupted if a polymerases is stalled.

555

556 Our results indicate that stalled RNA polymerases in the promoter region promote R-loop  
557 formation. It is clear that an R-loop cannot arise directly from the rifampicin-bound  
558 polymerase, as no more than 3 nucleotides have been added to the transcript. We hypothesize  
559 that the last active polymerase will generate an increasing amount of underwound DNA,  
560 which promotes R-loop formation, which stalls this polymerase. A domino effect may thus be  
561 created over the length of the gene (**Figure 7B**). The magnitude of this effect depends on the  
562 initial stalling event to be close to the beginning of the gene. In contrast, stalling a  
563 polymerase near to the end of the gene is unlikely to promote cascading R-loop formation  
564 since trailing polymerases will merely stack up neatly behind it until the initial blockage is  
565 cleared. Halting all transcription evenly will also have a lesser impact on R-loop formation. It  
566 is possible that pause sites in promoter regions might facilitate optimal spacing between  
567 polymerase molecules to promote productive transcription by preventing R-loop production.  
568 This domino model of formation of R-loops under rifampicin stress is a general, biologically  
569 plausible model that nonetheless will be affected by the propensity of the DNA sequence to  
570 form R-loops, and the availability of the complementary RNA to bind to DNA.



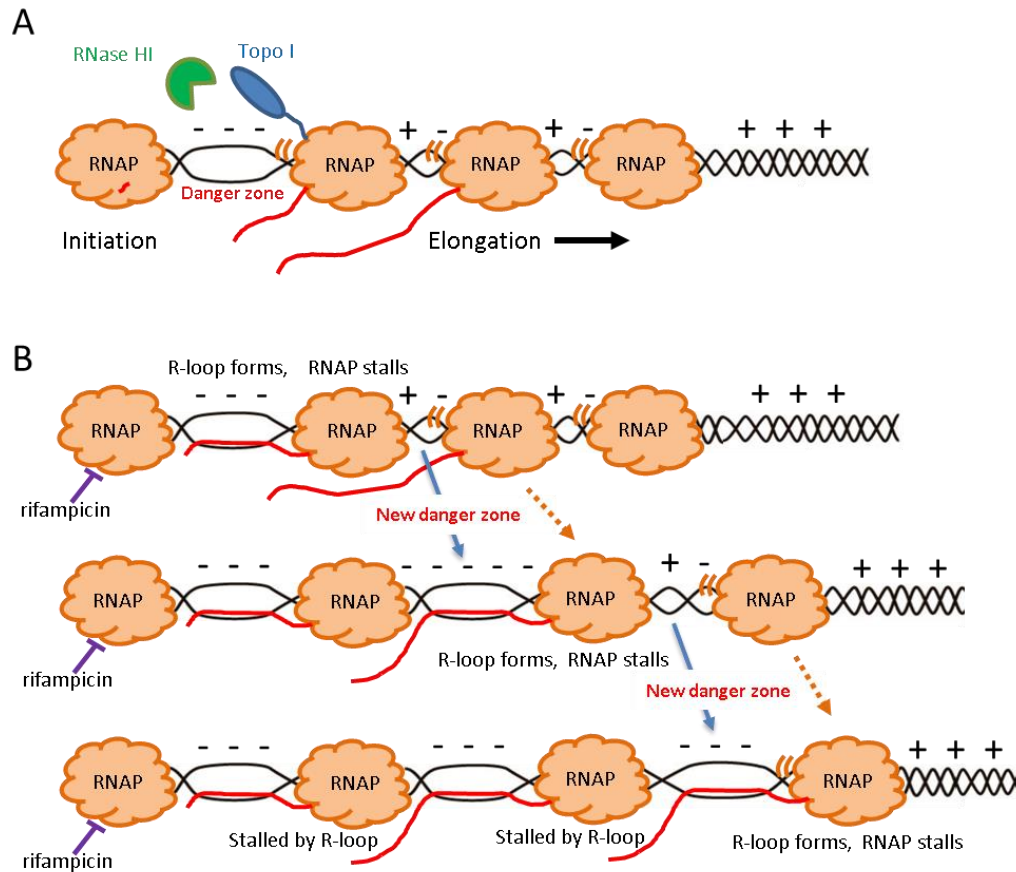

571

572 **Figure 7** “Domino effect” model of R-loop formation under rifampicin stress. **A.** A negatively supercoiled DNA  
 573 stretch (- - -) opens between a stationary RNAP (such as one in the promoter region, but can be paused  
 574 anywhere) and a mobile RNAP (motion indicated by ‘(‘). This danger zone for R-loop formation is policed by  
 575 topoisomerase I (blue, shown only once for clarity), which competes with mRNA (red line; only shown twice  
 576 for clarity) for underwound DNA, and by RNase HI (green). Zones between mobile RNAP are more likely to be  
 577 neutral (+ -). **B.** Under rifampicin stress, the promoter-bound RNAP cannot start elongating, the danger zone  
 578 becomes critically underwound, an R-loop forms and stalls its cognate RNAP. A new danger zone opens up  
 579 between this stalled RNAP and its adjacent mobile RNAP. A new R-loop forms, stalling its RNAP, and the  
 580 cycle continues until all mobile RNAP molecules are stalled by R-loops. Ribosomes are not shown.

581

582 Our observation that transcriptional inhibition leads to the accumulation of R-loops may also  
 583 open a window into the poorly understood mechanism by which rifampicin causes cell death.  
 584 Transcriptional inhibition has often been equated to translational inhibition in terms of  
 585 cellular consequences, as cell death is expected to arise primarily from the lack of protein  
 586 product (75) and not from lack of transcription *per se*. Transcriptomics is a widely used  
 587 approach to gain insight into the mode of action of an antibiotic, but as rifampicin inhibits  
 588 transcription globally, this approach has only been used on rifampicin-resistant strains (76)  
 589 that may have altered and variable gene expression as a result. As one of the effects of R-loop  
 590 formation is gene silencing, this may be more profound in some genes than others, and thus  
 591 RNA sequencing together with R-loop mapping may give alternative insights. Our model



592 suggests that an important aspect of rifampicin's bactericidal activity may be the genotoxic  
593 stresses inflicted by R-loop formation.

594  
595 We showed that even partial loss of RNase HI activity through the deletion of *rnhC* or *rnhA*  
596 synergised extraordinarily well with transcriptional inhibition by rifampicin at concentrations  
597 below the MIC<sub>90</sub> (Fig. 4). This reveals an unappreciated role for RNase HI in promoting  
598 survival and possibly persistence under rifampicin stress. Rifampicin is one of the front line  
599 drugs for TB therapy (2), and a vital component in resolving bacterial persistence *in vivo*  
600 (77). Notably, exposure to sub-MIC concentrations of rifampicin is thought to be  
601 instrumental in the emergence of antibiotic resistance in clinical settings. Our results suggest  
602 that inhibiting both RNase HI and transcription might act against the emergence of drug  
603 resistance, even in sub-MIC concentrations of inhibitors of both RNase HI and RNA  
604 polymerase. It also raises the possibility that RNase HI inhibition might rescue rifampicin as  
605 a treatment option in rifampicin-resistant bacteria, by increasing their sensitivity to its cellular  
606 effects.

607  
608 Partial loss of RNase HI activity also enhanced killing with moxifloxacin and streptomycin  
609 (Fig. 5A&B), and was compatible with isoniazid (Fig. 5D), indicating that in addition to  
610 providing a new target for drug development and enhancing first-line therapy, RNase HI  
611 inhibition would be a useful adjunct to second-line therapy as well. Uncoupling of  
612 transcription and translation is known to enhance R-loop production (54), and ribosomes can  
613 actively reverse stalled polymerases that might be more prone to R-loop formation (78). It is  
614 noteworthy however, that the combination of translational inhibition and RNase HI depletion  
615 does not affect the cell as potently as the combination of transcriptional inhibition and  
616 RNase HI depletion. We speculate that in the context of actively translocating RNA  
617 polymerases, the opportunity for R-loop formation due to translational inhibition is much  
618 reduced compared to the propensity for R-loop formation arising from stalled RNA  
619 polymerases, resulting in less synergy.

620  
621 Many antibiotics, including rifampicin, are antagonistic with moxifloxacin (79) so the  
622 synergy of the latter with RNase HI depletion is both intriguing and valuable. We  
623 hypothesize that the synergy of moxifloxacin with RNase HI depletion might result from an  
624 increased number of gyrase/DNA complexes due to the 3-fold increased expression of DNA  
625 gyrase (Fig. 1B), resulting in a higher DSB burden (80).

626

627 Our finding that RNase HI depletion does not potentiate amsacrine lethality (Fig. 5C)  
628 contrasts with the synthetic lethal effect in *E. coli* of the loss of RNase HI and  
629 topoisomerase I (5). This apparent anomaly could be due to various factors. First, the  
630 expression of topoisomerase I is less effectively induced in the  $\Delta rnhC$  strain than DNA  
631 gyrase I, which would be consistent with a topology-ameliorating effect of R-loops that has  
632 recently been proposed (81). Secondly, amsacrine is an uncompetitive inhibitor of  
633 topoisomerase I which binds to the topoisomerase I:DNA complex (82). Since  
634 topoisomerase I and mRNA are both localised by RNA polymerase, and are both competing  
635 for the same underwound DNA substrate, any R-loop formation would effectively remove  
636 underwound DNA as a substrate for topoisomerase I, and proportionally reduce the binding  
637 of amsacrine to a DNA:topoisomerase I complex, an opposite effect to that seen with  
638 moxifloxacin. A final possibility is that, although amsacrine is on-target in eukaryotic cells,  
639 and has been shown to inhibit *M. tuberculosis* topoisomerase I *in vitro* (82), it has not  
640 formally been shown that it does the same in *mycobacterial* cells. Topoisomerase I is an  
641 emerging drug target for development of anti-TB therapeutics. We predict that competitive  
642 inhibitors of topoisomerase I, which would more accurately mimic loss of the *topA* gene,  
643 might still be effective synergistic partners for RNase HI inhibitors.

644

645 The housekeeping nature of the enzymes involved in these synergistic combinations suggests  
646 that a wider application for combination therapeutics including RNase HI inhibitors also  
647 exists for other organisms. The loss of the *rnhC* gene in *Listeria monocytogenes* correlates  
648 with a loss of virulence in mice (58), and in *E. coli*, both streptomycin-resistant strains and  
649 rifampicin-resistant strains were competitively disadvantaged in  $\Delta rnhA$  backgrounds (13).  
650 This indicates the potential for therapeutic aspects of RNase HI inhibition in bacteria even  
651 where RNase HI activity is not essential under laboratory conditions, or where rifampicin  
652 tolerance is high.

653

654 This study identified four HIV RNase HI inhibitors that have activity against *M. tuberculosis*  
655 RNase HI *in vitro* and show synergy with rifampicin in a whole cell assay (Fig. 6). The  
656 compound NSC600285 in particular is known to affect human RNase HI *in vitro* (bioassay  
657 ID: 5185715), but is not toxic to eukaryotic cells, unless the cells are deficient in DNA  
658 replication or repair, such as the  $\Delta rad50$  and  $\Delta rad18$  yeast strains (bioassay ID: 3254803).  
659 This supports an on-target effect in eukaryotic cells, but indicates that modifications are

660 necessary to develop these chemical scaffolds for higher affinity and specificity for  
661 *M. tuberculosis* RNase HI. However, the inhibition we observe indicates that these scaffolds  
662 can penetrate both eukaryotic and prokaryotic cell walls, a key consideration for the delivery  
663 of antibiotics to intracellular pathogens such as *M. tuberculosis* and *L. monocytogenes*. In  
664 combination, these lines of evidence strongly support an on-target effect on RNase HI *in vivo*  
665 for these compounds, but the generation of resistant mutants to formally prove on-target *in*  
666 *vivo* activity will require the development of compounds with higher affinity. Crystal  
667 structures of the compounds in complex with *M. tuberculosis* RNase HI will allow more  
668 extensive structure-activity relationships to be established, and we are actively pursuing this  
669 avenue. The use of rifampicin as a sensitizing compound will be advantageous in high-  
670 throughput screening, both for isolating compounds that might otherwise inhibit RNase HI  
671 too weakly to be identified in a normal growth inhibition screen, and for prioritizing hits for  
672 further investigation and development.

673

674 As rifampicin is a naturally occurring antibiotic, produced by the actinobacterium  
675 *Amycolatopsis rifamycinica* (83), it is not likely to be present at lethal concentrations in its  
676 native environment. The model of rifampicin action proposed in this paper suggests that the  
677 maximum cellular impact on the target organism is achieved by stochastically halting  
678 transcription at its earliest point on the gene. Coupled with the physical protection of the  
679 initiation region from subsequent initiation events, this produces a formidable and subtle  
680 weapon since it uses the target cell's transcriptional capacity to amplify the cytotoxic impact.  
681 Many further questions arise from this model. For example, does transcription arising from  
682 co-directional or divergent genes ameliorate or amplify this effect? Are terminal genes in  
683 operons disproportionately silenced? Does R-loop formation occur whenever there is a change  
684 in gene expression? Future work to answer these questions will help to further understand the  
685 intricacies of R-loop metabolism that this model implies.

686

687 In summary, this study validates RNase HI as a vulnerable, druggable target in the  
688 mycobacteria. It provides insight into R-loop metabolism in general, and specifically  
689 highlights the contribution that low-level transcriptional inhibition makes to R-loop  
690 formation. It also demonstrates the proof of principle that this is a novel cellular  
691 susceptibility, which can be utilised as an anti-bacterial strategy. Finally, it provides a starting

692 point for the development of new anti-TB therapeutics based on re-purposing and expanding  
693 existing chemical scaffolds with favourable pharmaceutical properties.

694

695 **Acknowledgments and funding:**

696 We thank the Health Research Council of New Zealand (Grant 20/798), the Maurice Wilkins  
697 Centre for Molecular Biodiscovery, the South African National Research Foundation, the  
698 South African Medical Research Council, and the South African National Health Laboratory  
699 Service Research Trust for financial support. We thank Prof Deborah Williamson for helpful  
700 discussions.

## 701 References

- 702 1. O’Neill J. 2016. Tackling drug-resistant infections globally: final report and recommendations.  
703 Wellcome Trust 1-84.
- 704 2. WHO. 2020. Treatment of tuberculosis guideline
- 705 3. Conradie F, Diacon AH, Ngubane N, Howell P, Everitt D, Crook AM, Mendel CM, Egizi E,  
706 Moreira J, Timm J, McHugh TD, Wills GH, Bateson A, Hunt R, Van Niekerk C, Li M,  
707 Olugbosi M, Spigelman M, Nix TBTT. 2020. Treatment of Highly Drug-Resistant Pulmonary  
708 Tuberculosis. *N Engl J Med* 382:893-902.
- 709 4. Thomas M, White RL, Davis RW. 1976. Hybridization of RNA to Double-Stranded DNA:  
710 Formation of R-Loops. *PNAS* 73:2294-2298.
- 711 5. Drolet M, Phoenix P, Menzel R, Massé E, Liu LF, Crouch RJ. 1995. Overexpression of  
712 RNase H partially complements the growth defect of an *Escherichia coli* delta *topA* mutant:  
713 R-loop formation is a major problem in the absence of DNA topoisomerase I. *Proc Natl Acad*  
714 *Sci U S A* 92:3526-3530.
- 715 6. Alzu A, Bermejo R, Begnis M, Lucca C, Piccini D, Carotenuto W, Saponaro M, Brambati A,  
716 Cocito A, Foiani M, Liberi G. 2012. Senataxin associates with replication forks to protect  
717 fork integrity across RNA-polymerase-II-transcribed genes. *Cell* 151:835-846.
- 718 7. Santos-Pereira JM, Herrero AB, Garcia-Rubio ML, Marin A, Moreno S, Aguilera A. 2013.  
719 The Npl3 hnRNP prevents R-loop-mediated transcription-replication conflicts and genome  
720 instability. *Genes Dev* 27:2445-58.
- 721 8. Dominguez-Sanchez MS, Barroso S, Gomez-Gonzalez B, Luna R, Aguilera A. 2011. Genome  
722 instability and transcription elongation impairment in human cells depleted of THO/TREX.  
723 *PLoS Genet* 7:e1002386.
- 724 9. Tuduri S, Crabbe L, Conti C, Tourriere H, Holtgreve-Grez H, Jauch A, Pantesco V, De Vos J,  
725 Thomas A, Theillet C, Pommier Y, Tazi J, Coquelle A, Pasero P. 2009. Topoisomerase I  
726 suppresses genomic instability by preventing interference between replication and  
727 transcription. *Nat Cell Biol* 11:1315-24.
- 728 10. Dasgupta S, Masukata H, Tomizawa J. 1987. Multiple mechanisms for initiation of ColE1  
729 DNA replication: DNA synthesis in the presence and absence of ribonuclease H. *Cell*  
730 51:1113-22.
- 731 11. Ivančić-Baće I, Al Howard J, Bolt EL. 2012. Tuning in to interference: R-loops and cascade  
732 complexes in CRISPR immunity. *J Mol Biol* 422:607-616.
- 733 12. Stein H, Hausen P. 1969. Enzyme from calf thymus degrading the RNA moiety of DNA-  
734 RNA Hybrids: effect on DNA-dependent RNA polymerase. *Science* 166:393-5.
- 735 13. Balbontín R, Frazão N, Gordo I. 2020. DNA breaks-mediated cost reveals RNase HI as a new  
736 target for selectively eliminating antibiotic resistance. *bioRxiv* doi:10.1101/756767:756767.
- 737 14. Boyer PL, Smith SJ, Zhao XZ, Das K, Gruber K, Arnold E, Burke TR, Hughes SH. 2018.  
738 Developing and Evaluating Inhibitors against the RNase H Active Site of HIV-1 Reverse  
739 Transcriptase. *J Virol* 92:e02203-17.
- 740 15. Poongavanam V, Corona A, Steinmann C, Scipione L, Grandi N, Pandolfi F, Di Santo R,  
741 Costi R, Esposito F, Tramontano E, Kongsted J. 2018. Structure-guided approach identifies a  
742 novel class of HIV-1 ribonuclease H inhibitors: binding mode insights through magnesium  
743 complexation and site-directed mutagenesis studies. *Medchemcomm* 9:562-575.
- 744 16. Cao L, Song W, De Clercq E, Zhan P, Liu X. 2014. Recent progress in the research of small  
745 molecule HIV-1 RNase H inhibitors. *Curr Med Chem* 21:1956-67.
- 746 17. Watkins HA, Baker EN. 2010. Structural and functional characterization of an RNase HI  
747 domain from the bifunctional protein Rv2228c from *Mycobacterium tuberculosis*. *J Bacteriol*  
748 192:2878-86.
- 749 18. Minias AE, Brzostek AM, Korycka-Machala M, Dziadek B, Minias P, Rajagopalan M,  
750 Madiraju M, Dziadek J. 2015. RNase HI Is Essential for Survival of *Mycobacterium*  
751 *smegmatis*. *PLOS One* 10:e0126260.
- 752 19. Gupta R, Chatterjee D, Glickman MS, Shuman S. 2017. Division of labor among  
753 *Mycobacterium smegmatis* RNase H enzymes: RNase HI activity of RnhA or RnhC is

- 754 essential for growth whereas RnhB and RnhA guard against killing by hydrogen peroxide in  
755 stationary phase. *Nucleic Acids Res* 45:1-14.
- 756 20. Czubat B, Minias A, Brzostek A, Żaczek A, Struś K, Zakrzewska-Czerwińska J, Dziadek J.  
757 2020. Functional Disassociation Between the Protein Domains of MSMEG\_4305 of  
758 *Mycobacterium smegmatis* (*Mycobacterium smegmatis*) in vivo. *Front Microbiol* 11.
- 759 21. Jacewicz A, Shuman S. 2015. Biochemical Characterization of *Mycobacterium smegmatis*  
760 RnhC (MSMEG\_4305), a Bifunctional Enzyme Composed of Autonomous N-Terminal Type  
761 I RNase H and C-Terminal Acid Phosphatase Domains. *J Bacteriol* 197:2489-98.
- 762 22. Lamichhane G, Zignol M, Blades NJ, Geiman DE, Dougherty A, Grosset J, Broman KW,  
763 Bishai WR. 2003. A postgenomic method for predicting essential genes at subsaturation  
764 levels of mutagenesis: application to *Mycobacterium tuberculosis*. *Proc Natl Acad Sci U S A*  
765 100:7213-8.
- 766 23. Griffin JE, Gawronski JD, Dejesus MA, Ioerger TR, Akerley BJ, Sassetti CM. 2011. High-  
767 resolution phenotypic profiling defines genes essential for mycobacterial growth and  
768 cholesterol catabolism. *PLoS Pathog* 7:e1002251.
- 769 24. Parish T, Stoker NG. 2000. Use of a flexible cassette method to generate a double unmarked  
770 *Mycobacterium tuberculosis tlyA plcABC* mutant by gene replacement. *Microbiology* 146 ( Pt  
771 8):1969-1975.
- 772 25. Andreu N, Zelmer A, Fletcher T, Elkington PT, Ward TH, Ripoll J, Parish T, Bancroft GJ,  
773 Schaible U, Robertson BD, Wiles S. 2010. Optimisation of bioluminescent reporters for use  
774 with mycobacteria. *PLoS One* 5:e10777.
- 775 26. Rauzier J, Moniz-Pereira J, Gicquel-Sanzey B. 1988. Complete nucleotide sequence of  
776 pAL5000, a plasmid from *Mycobacterium fortuitum*. *Gene* 71:315-321.
- 777 27. Machowski EE, Dawes S, Mizrahi V. 2005. TB tools to tell the tale-molecular genetic  
778 methods for mycobacterial research. *Int J Biochem Cell Biol* 37:54-68.
- 779 28. Dawes SS, Crouch RJ, Morris SL, Mizrahi V. 1995. Cloning, sequence analysis,  
780 overproduction in *Escherichia coli* and enzymatic characterization of the RNase HI from  
781 *Mycobacterium smegmatis*. *Gene* 165:71-5.
- 782 29. Downing KJ, McAdam RA, Mizrahi V. 1999. *Staphylococcus aureus* nuclease is a useful  
783 secretion reporter for mycobacteria. *Gene* 239:293-9.
- 784 30. Belisle JT, Mahaffey SB, Hill PJ. 2009. Isolation of mycobacterium species genomic DNA.  
785 *Methods Mol Biol* 465:1-12.
- 786 31. Miller J. 1972. Assay of B-galactosidase In: *Experiments in molecular genetics*. CSH  
787 Laboratory Press, Cold  
788 Spring Harbor, New York.
- 789 32. Griffith KL, Wolf RE, Jr. 2002. Measuring beta-galactosidase activity in bacteria: cell  
790 growth, permeabilization, and enzyme assays in 96-well arrays. *Biochem Biophys Res*  
791 *Commun* 290:397-402.
- 792 33. Sambandamurthy VK, Derrick SC, Hsu T, Chen B, Larsen MH, Jalapathy KV, Chen M, Kim  
793 J, Porcelli SA, Chan J, Morris SL, Jacobs WR, Jr. 2006. *Mycobacterium tuberculosis*  
794 DeltaRD1 DeltapanCD: a safe and limited replicating mutant strain that protects  
795 immunocompetent and immunocompromised mice against experimental tuberculosis.  
796 *Vaccine* 24:6309-20.
- 797 34. Walker IH, Hsieh PC, Riggs PD. 2010. Mutations in maltose-binding protein that alter  
798 affinity and solubility properties. *Appl Microbiol Biotechnol* 88:187-97.
- 799 35. Cordingley MG, Callahan PL, Sardana VV, Garsky VM, Colonno RJ. 1990. Substrate  
800 requirements of human rhinovirus 3C protease for peptide cleavage in vitro. *J Biol Chem*  
801 265:9062-5.
- 802 36. Studier FW, Moffatt BA. 1986. Use of bacteriophage T7 RNA polymerase to direct selective  
803 high-level expression of cloned genes. *J Mol Biol* 189:113-30.
- 804 37. Studier FW. 2005. Protein production by auto-induction in high density shaking cultures.  
805 *Protein Expr Purif* 41:207-34.



- 806 38. Cordingley MG, Callahan PL, Sardana VV, Garsky VM, Colonno RJ. 1990. Substrate  
807 requirements of human rhinovirus 3C protease for peptide cleavage in vitro. *J Biol Chem*  
808 265:9062-9065.
- 809 39. Parniak MA, Min K-L, Budihas SR, Le Grice SFJ, Beutler JA. 2003. A fluorescence-based  
810 high-throughput screening assay for inhibitors of human immunodeficiency virus-1 reverse  
811 transcriptase-associated ribonuclease H activity. *Anal Biochem* 322:33-39.
- 812 40. Belotserkovskii BP, Soo Shin JH, Hanawalt PC. 2017. Strong transcription blockage  
813 mediated by R-loop formation within a G-rich homopurine-homopyrimidine sequence  
814 localized in the vicinity of the promoter. *Nucleic Acids Res* 45:6589-6599.
- 815 41. Tous C, Aguilera A. 2007. Impairment of transcription elongation by R-loops in vitro.  
816 *Biochem Biophys Res Commun* 360:428-32.
- 817 42. Unniraman S, Nagaraja V. 1999. Regulation of DNA gyrase operon in *Mycobacterium*  
818 *smegmatis*: a distinct mechanism of relaxation stimulated transcription. *Genes Cells* 4:697-  
819 706.
- 820 43. Ahmed W, Menon S, D. N. B. Karthik PV, Nagaraja V. 2015. Autoregulation of  
821 topoisomerase I expression by supercoiling sensitive transcription. *Nucleic Acids Research*  
822 44:1541-1552.
- 823 44. Boguslawski SJ, Smith DE, Michalak MA, Mickelson KE, Yehle CO, Patterson WL, Carrico  
824 RJ. 1986. Characterization of monoclonal antibody to DNA.RNA and its application to  
825 immunodetection of hybrids. *J Immunol Methods* 89:123-30.
- 826 45. Hong X, Cadwell GW, Kogoma T. 1995. *Escherichia coli* RecG and RecA proteins in R-loop  
827 formation. *EMBO J* 14:2385-2392.
- 828 46. Ranes MG, Rauzier J, Lagranderie M, Gheorghiu M, Gicquel B. 1990. Functional analysis of  
829 pAL5000, a plasmid from *Mycobacterium fortuitum*: construction of a "mini"  
830 mycobacterium-*Escherichia coli* shuttle vector. *J Bacteriol* 172:2793.
- 831 47. Bourn WR, Jansen Y, Stutz H, Warren RM, Williamson AL, van Helden PD. 2007. Creation  
832 and characterisation of a high-copy-number version of the pAL5000 mycobacterial replicon.  
833 *Tuberculosis (Edinb)* 87:481-8.
- 834 48. Samul R, Leng F. 2007. Transcription-coupled hypernegative supercoiling of plasmid DNA  
835 by T7 RNA polymerase in *Escherichia coli* topoisomerase I-deficient strains. *J Mol Biol*  
836 374:925-935.
- 837 49. Wolak C, Ma HJ, Soubry N, Sandler SJ, Reyes-Lamothe R, Keck JL. 2020. Interaction with  
838 single-stranded DNA-binding protein localizes ribonuclease HI to DNA replication forks and  
839 facilitates R-loop removal. *Mol Microbiol* 114:495-509.
- 840 50. McClure WR, Cech CL. 1978. On the mechanism of rifampicin inhibition of RNA synthesis.  
841 *J Biol Chem* 253:8949-8956.
- 842 51. Agrawal P, Miryala S, Varshney U. 2015. Use of *Mycobacterium smegmatis* deficient in  
843 ADP-ribosyltransferase as surrogate for *Mycobacterium tuberculosis* in drug testing and  
844 mutation analysis. *PLoS One* 10:e0122076.
- 845 52. Li X-Z, Zhang L, Nikaido H. 2004. Efflux pump-mediated intrinsic drug resistance in  
846 *Mycobacterium smegmatis*. *Antimicrob Agents Chemother* 48:2415-2423.
- 847 53. Gowrishankar J, Harinarayanan R. 2004. Why is transcription coupled to translation in  
848 bacteria? *Mol Microbiol* 54:598-603.
- 849 54. Masse E, Drolet M. 1999. R-loop-dependent hypernegative supercoiling in *Escherichia coli*  
850 *topA* mutants preferentially occurs at low temperatures and correlates with growth inhibition.  
851 *J Mol Biol* 294:321-32.
- 852 55. Yang Z, Hou Q, Cheng L, Xu W, Hong Y, Li S, Sun Q. 2017. RNase H1 Cooperates with  
853 DNA Gyrase to Restrict R-Loops and Maintain Genome Integrity in Arabidopsis  
854 Chloroplasts. *Plant Cell* 29:2478.
- 855 56. Winder FG, Collins PB. 1970. Inhibition by Isoniazid of Synthesis of Mycolic Acids in  
856 *Mycobacterium tuberculosis*. *J Gen Microbiol* 63:41-48.
- 857 57. Chen J, Raymond K. 2006. Roles of rifampicin in drug-drug interactions: underlying  
858 molecular mechanisms involving the nuclear pregnane X receptor. *Ann Clin Microbiol*  
859 *Antimicrob* 5:3-3.



- 860 58. Lang KS, Hall AN, Merrikkh CN, Ragheb M, Tabakh H, Pollock AJ, Woodward JJ, Dreifus  
861 JE, Merrikkh H. 2017. Replication-Transcription Conflicts Generate R-Loops that Orchestrate  
862 Bacterial Stress Survival and Pathogenesis. *Cell* 170:787-799.e18.
- 863 59. Wahba L, Amon JD, Koshland D, Vuica-Ross M. 2011. RNase H and multiple RNA  
864 biogenesis factors cooperate to prevent RNA:DNA hybrids from generating genome  
865 instability. *Mol Cell* 44:978-88.
- 866 60. Amon JD, Koshland D. 2016. RNase H enables efficient repair of R-loop induced DNA  
867 damage. *Elife* 5.
- 868 61. Parajuli S, Teasley DC, Murali B, Jackson J, Vindigni A, Stewart SA. 2017. Human  
869 ribonuclease H1 resolves R-loops and thereby enables progression of the DNA replication  
870 fork. *J Biol Chem* 292:15216-15224.
- 871 62. Rawal P, Kummarasetti VB, Ravindran J, Kumar N, Halder K, Sharma R, Mukerji M, Das  
872 SK, Chowdhury S. 2006. Genome-wide prediction of G4 DNA as regulatory motifs: role in  
873 *Escherichia coli* global regulation. *Genome Res* 16:644-55.
- 874 63. Gomez-Gonzalez B, Garcia-Rubio M, Bermejo R, Gaillard H, Shirahige K, Marin A, Foiani  
875 M, Aguilera A. 2011. Genome-wide function of THO/TREX in active genes prevents R-loop-  
876 dependent replication obstacles. *Embo j* 30:3106-19.
- 877 64. Gan W, Guan Z, Liu J, Gui T, Shen K, Manley JL, Li X. 2011. R-loop-mediated genomic  
878 instability is caused by impairment of replication fork progression. *Genes Dev* 25:2041-56.
- 879 65. O'Connell K, Jinks-Robertson S, Petes TD. 2015. Elevated Genome-Wide Instability in Yeast  
880 Mutants Lacking RNase H Activity. *Genetics* 201:963-75.
- 881 66. Li X, Manley JL. 2005. Inactivation of the SR protein splicing factor ASF/SF2 results in  
882 genomic instability. *Cell* 122:365-78.
- 883 67. Hatchi E, Skourti-Stathaki K, Vents S, Pinello L, Yen A, Kamieniarz-Gdula K, Dimitrov S,  
884 Pathania S, McKinney KM, Eaton ML, Kellis M, Hill SJ, Parmigiani G, Proudfoot NJ,  
885 Livingston DM. 2015. BRCA1 recruitment to transcriptional pause sites is required for R-  
886 loop-driven DNA damage repair. *Mol Cell* 57:636-647.
- 887 68. Sordet O, Redon CE, Guirouilh-Barbat J, Smith S, Solier S, Douarre C, Conti C, Nakamura  
888 AJ, Das BB, Nicolas E, Kohn KW, Bonner WM, Pommier Y. 2009. Ataxia telangiectasia  
889 mutated activation by transcription- and topoisomerase I-induced DNA double-strand breaks.  
890 *EMBO Rep* 10:887-93.
- 891 69. Dutta D, Shatalin K, Epshtein V, Gottesman ME, Nudler E. 2011. Linking RNA polymerase  
892 backtracking to genome instability in *E. coli*. *Cell* 146:533-43.
- 893 70. Zatreanu D, Han Z, Mitter R, Tumini E, Williams H, Gregersen L, Dirac-Svejstrup AB, Roma  
894 S, Stewart A, Aguilera A, Svejstrup JQ. 2019. Elongation Factor TFIIS Prevents  
895 Transcription Stress and R-Loop Accumulation to Maintain Genome Stability. *Mol Cell*  
896 76:57-69.e9.
- 897 71. Zhang X, Chiang HC, Wang Y, Zhang C, Smith S, Zhao X, Nair SJ, Michalek J, Jatoi I,  
898 Lautner M, Oliver B, Wang H, Petit A, Soler T, Brunet J, Mateo F, Angel Pujana M, Poggi E,  
899 Chaldeckas K, Isaacs C, Peshkin BN, Ochoa O, Chedin F, Theoharis C, Sun LZ, Curiel TJ,  
900 Elledge R, Jin VX, Hu Y, Li R. 2017. Attenuation of RNA polymerase II pausing mitigates  
901 BRCA1-associated R-loop accumulation and tumorigenesis. *Nat Commun* 8:15908.
- 902 72. Wu HY, Shyy SH, Wang JC, Liu LF. 1988. Transcription generates positively and negatively  
903 supercoiled domains in the template. *Cell* 53:433-40.
- 904 73. Tsao Y-P, Wu H-Y, Liu LF. 1989. Transcription-driven supercoiling of DNA: Direct  
905 biochemical evidence from in vitro studies. *Cell* 56:111-118.
- 906 74. Ahmed W, Sala C, Hegde SR, Jha RK, Cole ST, Nagaraja V. 2017. Transcription facilitated  
907 genome-wide recruitment of topoisomerase I and DNA gyrase. *PLoS Genet* 13:e1006754.
- 908 75. Baquero F, Levin BR. 2021. Proximate and ultimate causes of the bactericidal action of  
909 antibiotics. *Nat Rev Microbiol* 19:123-132.
- 910 76. de Knecht GJ, Bruning O, ten Kate MT, de Jong M, van Belkum A, Endtz HP, Breit TM,  
911 Bakker-Woudenberg IA, de Steenwinkel JE. 2013. Rifampicin-induced transcriptome  
912 response in rifampicin-resistant *Mycobacterium tuberculosis*. *Tuberculosis (Edinb)* 93:96-  
913 101.

- 914 77. Hu Y, Mangan JA, Dhillon J, Sole KM, Mitchison DA, Butcher PD, Coates AR. 2000.  
915 Detection of mRNA transcripts and active transcription in persistent *Mycobacterium*  
916 *tuberculosis* induced by exposure to rifampin or pyrazinamide. *J Bacteriol* 182:6358-6365.
- 917 78. Stevenson-Jones F, Woodgate J, Castro-Roa D, Zenkin N. 2020. Ribosome reactivates  
918 transcription by physically pushing RNA polymerase out of transcription arrest. *Proc Natl*  
919 *Acad Sci U S A* 117:8462.
- 920 79. Cokol M, Kuru N, Bicak E, Larkins-Ford J, Aldridge BB. 2017. Efficient measurement and  
921 factorization of high-order drug interactions in *Mycobacterium tuberculosis*. *Sci Adv*  
922 3:e1701881.
- 923 80. Malik M, Zhao X, Drlica K. 2006. Lethal fragmentation of bacterial chromosomes mediated  
924 by DNA gyrase and quinolones. *Mol Microbiol* 61:810-825.
- 925 81. Stolz R, Sulthana S, Hartono SR, Malig M, Benham CJ, Chedin F. 2019. Interplay between  
926 DNA sequence and negative superhelicity drives R-loop structures. *Proc Natl Acad Sci U S A*  
927 116:6260-6269.
- 928 82. Godbole AA, Ahmed W, Bhat RS, Bradley EK, Ekins S, Nagaraja V. 2014. Inhibition of  
929 *Mycobacterium tuberculosis* topoisomerase I by m-AMSA, a eukaryotic type II  
930 topoisomerase poison. *Biochem Biophys Res Commun* 446:916-920.
- 931 83. Bala S, Khanna R, Dadhwal M, Prabakaran SR, Shivaji S, Cullum J, Lal R. 2004.  
932 Reclassification of *Amycolatopsis mediterranei* DSM 46095 as *Amycolatopsis rifamycinica*  
933 sp. nov. *Int J Syst Evol Microbiol* 54:1145-1149.

934

935
